# Supplementary material for: A pathogenic role for cystic fibrosis transmembrane conductance regulator in celiac disease
Source: PubMed Central journal article supplement — EMBO J. 2018 Nov 28;38(2):e100101. doi: 10.15252/embj.2018100101 (PMC6331719; doi:10.15252/embj.2018100101), 2018-11-28

Figure 3C

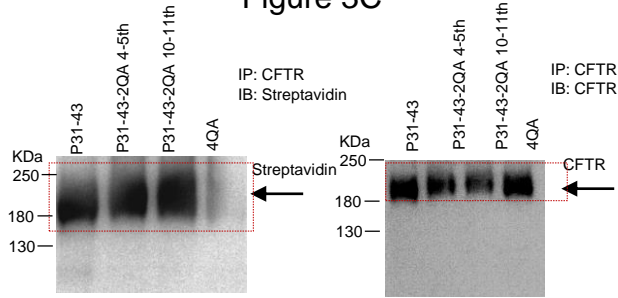

Figure 3D

| Caco-2 cells | Ussing Chamber |            |    |
|--------------|----------------|------------|----|
|              | Sample         | Mean pg/ml | sd |
| None         | 29,1333333     | 2,665208   | 3  |
| P31-43       | 5,63333333     | 1,02632    | 3  |
| P31-43-4QA   | 22,8           | 1,212436   | 3  |

Figure 3E

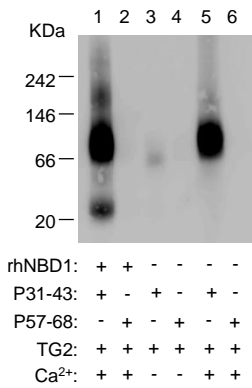

Figure 3F

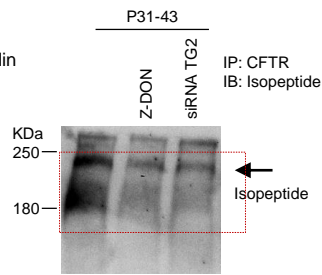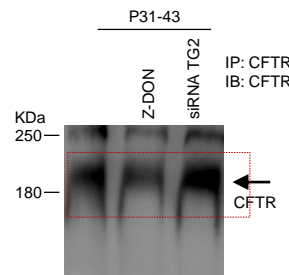

Figure 3G

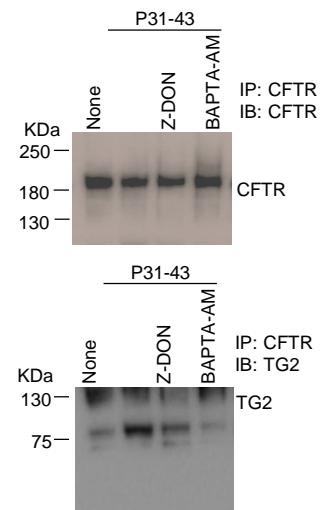

Figure 3H

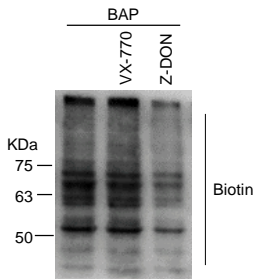

Figure 3J

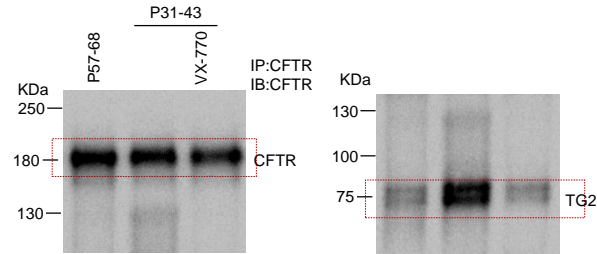

Figure 3K

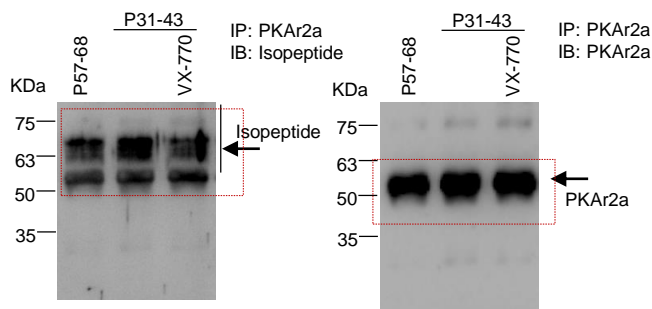

Figure 3L

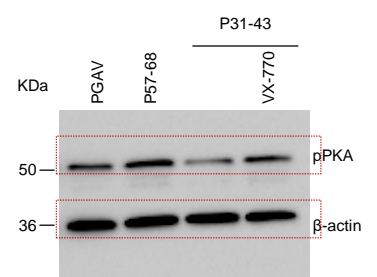

Replicates

Figure 3C

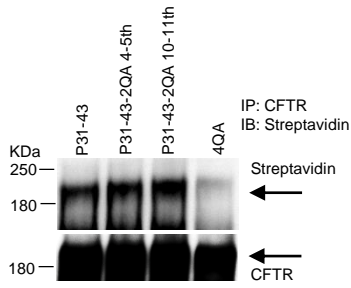

Figure 3F

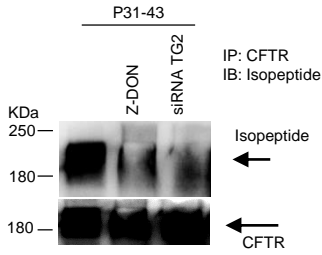

Figure 3G+J

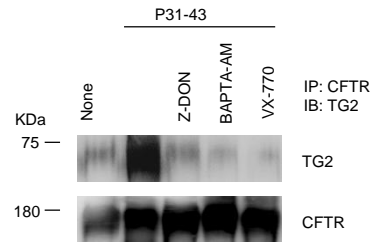

Figure 3H

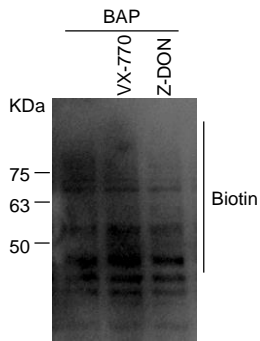

Figure 3K

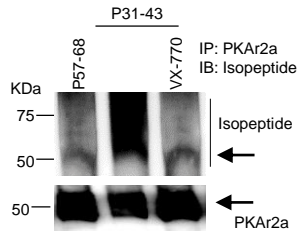

Figure 3L

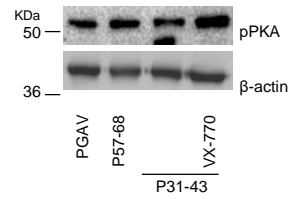

Supplement: EMBJ-38-e100101-s005.pdf [file EMBJ-38-e100101-s005.pdf]
