# Supplementary material for: A pathogenic role for cystic fibrosis transmembrane conductance regulator in celiac disease
Source: PubMed Central journal article supplement — EMBO J. 2018 Nov 28;38(2):e100101. doi: 10.15252/embj.2018100101 (PMC6331719; doi:10.15252/embj.2018100101), 2018-11-28
Supplement: EMBJ-38-e100101-s002.pdf [file EMBJ-38-e100101-s002.pdf]

## Expanded View Figures

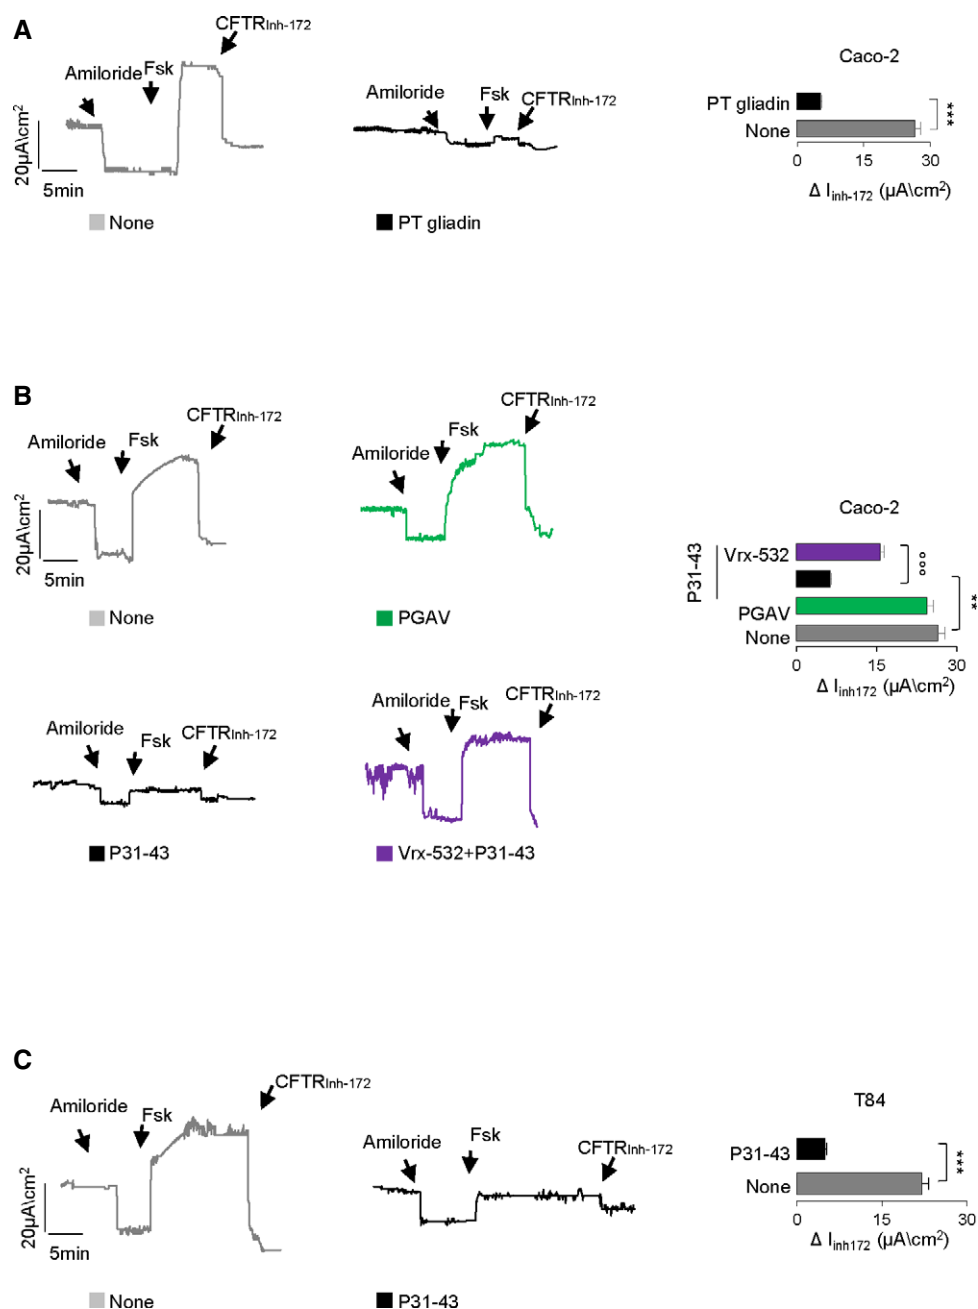

**Figure EV1. Effects of gliadin and gliadin peptides on CFTR channel function in intestinal epithelial cells.**

A–C Treatment of Caco-2 cells (A, B) or T84 (C) cells with a PT gliadin (500  $\mu g/ml$ ) (A) or P57–68 or PGAV or P31–43 (20  $\mu g/ml$ ; 3 h) in the presence or absence of pre-treatment with Vrx-532. CFTR-dependent  $Cl^-$  secretion measured by means of forskolin-induced (Fsk) increase in the chloride current [ $I_{sc}$  ( $\mu A/cm^2$ )] in cells mounted in Ussing chambers; quantification of the peak CFTR Inhibitor 172 (CFTRinh172)-sensitive  $I_{sc}$  ( $\Delta I_{sc}$ ;  $n = 3$  independent experiments). Mean  $\pm$  SD of samples assayed. \*\*\* $P < 0.001$  vs. PT gliadin (A) or vs. P31–43 (C) or \*\* $P < 0.01$  vs. P31–43 (B), °°° $P < 0.01$  vs. P31–43 + Vrx-532.

Source data are available online for this figure.

**Figure EV2. Effects of P31–43 stimulation on forskolin-activated CFTR channel.**

- A Representative traces of CFTR-dependent  $\text{Cl}^-$  secretion measured by forskolin (Fsk)-inducible chloride current [ $\text{I}_{\text{sc}}$  ( $\mu\text{A}/\text{cm}^2$ )] in Caco-2 cells mounted in Ussing chambers: effects of P31–43 (100  $\mu\text{M}$ ) and PGAV (100  $\mu\text{M}$ ) directly added to the bathing solution. After amiloride, the solution was directly supplied with buffer only (none, gray traces), with PGAV (green traces) or P31–43 (black traces) for 3–5 min (as detailed in Materials and Methods) and then pulsed with forskolin (Fsk; 20  $\mu\text{M}$ ) and finally with the CFTR inhibitor 172 (CFTRinh<sub>172</sub>). Yellow traces: after amiloride, the solution was first supplied with VX-770 (10  $\mu\text{M}$ ) followed by P31–43 (100  $\mu\text{M}$ ) and then pulsed with forskolin (Fsk) followed by CFTRinh<sub>172</sub>. Quantification of the peak CFTR inhibitor 172 (CFTRinh<sub>172</sub>)-sensitive  $\text{I}_{\text{sc}}$  ( $\Delta\text{I}_{\text{sc}}$ ) in Caco-2 cells ( $n = 3$  independent experiments, mean  $\pm$  SD).  $^{**}P < 0.01$  None or PGAV (gray or green traces) vs. P31–43 followed by Fsk (black traces),  $^{oo}P < 0.01$  P31–43 followed by Fsk (black trace) vs. VX-770 followed by P31–43 and then by Fsk (yellow trace; ANOVA, Bonferroni *post hoc* test).
- B Whole-cell CFTR current densities induced by 10  $\mu\text{M}$  forskolin (Fsk) at +100 mV in Caco-2 cells w/o treatment (left), with 100  $\mu\text{M}$  P31–43 peptide in the luminal solution during patch clamping (middle), or after treatment with 20  $\mu\text{M}$  VX-770 (20 min), followed by an application of 100  $\mu\text{M}$  P31–43 peptide in the luminal solution while patch clamping (right). Current–voltage (I–V) relationships were elicited by ramps from –100 mV to +100 mV (holding potential, –40 mV). Statistical analysis of average CFTR current densities induced by forskolin and blocked by CFTR inh-172 in cells treated as described.  $n \geq 3$ ;  $^{***}P < 0.001$  basal vs. P31–43,  $^{ooo}P < 0.001$  P31–43 vs. VX770 + P31–43, two-way ANOVA with Bonferroni post-test. Data are presented as means  $\pm$  SEM (bottom).

Source data are available online for this figure.

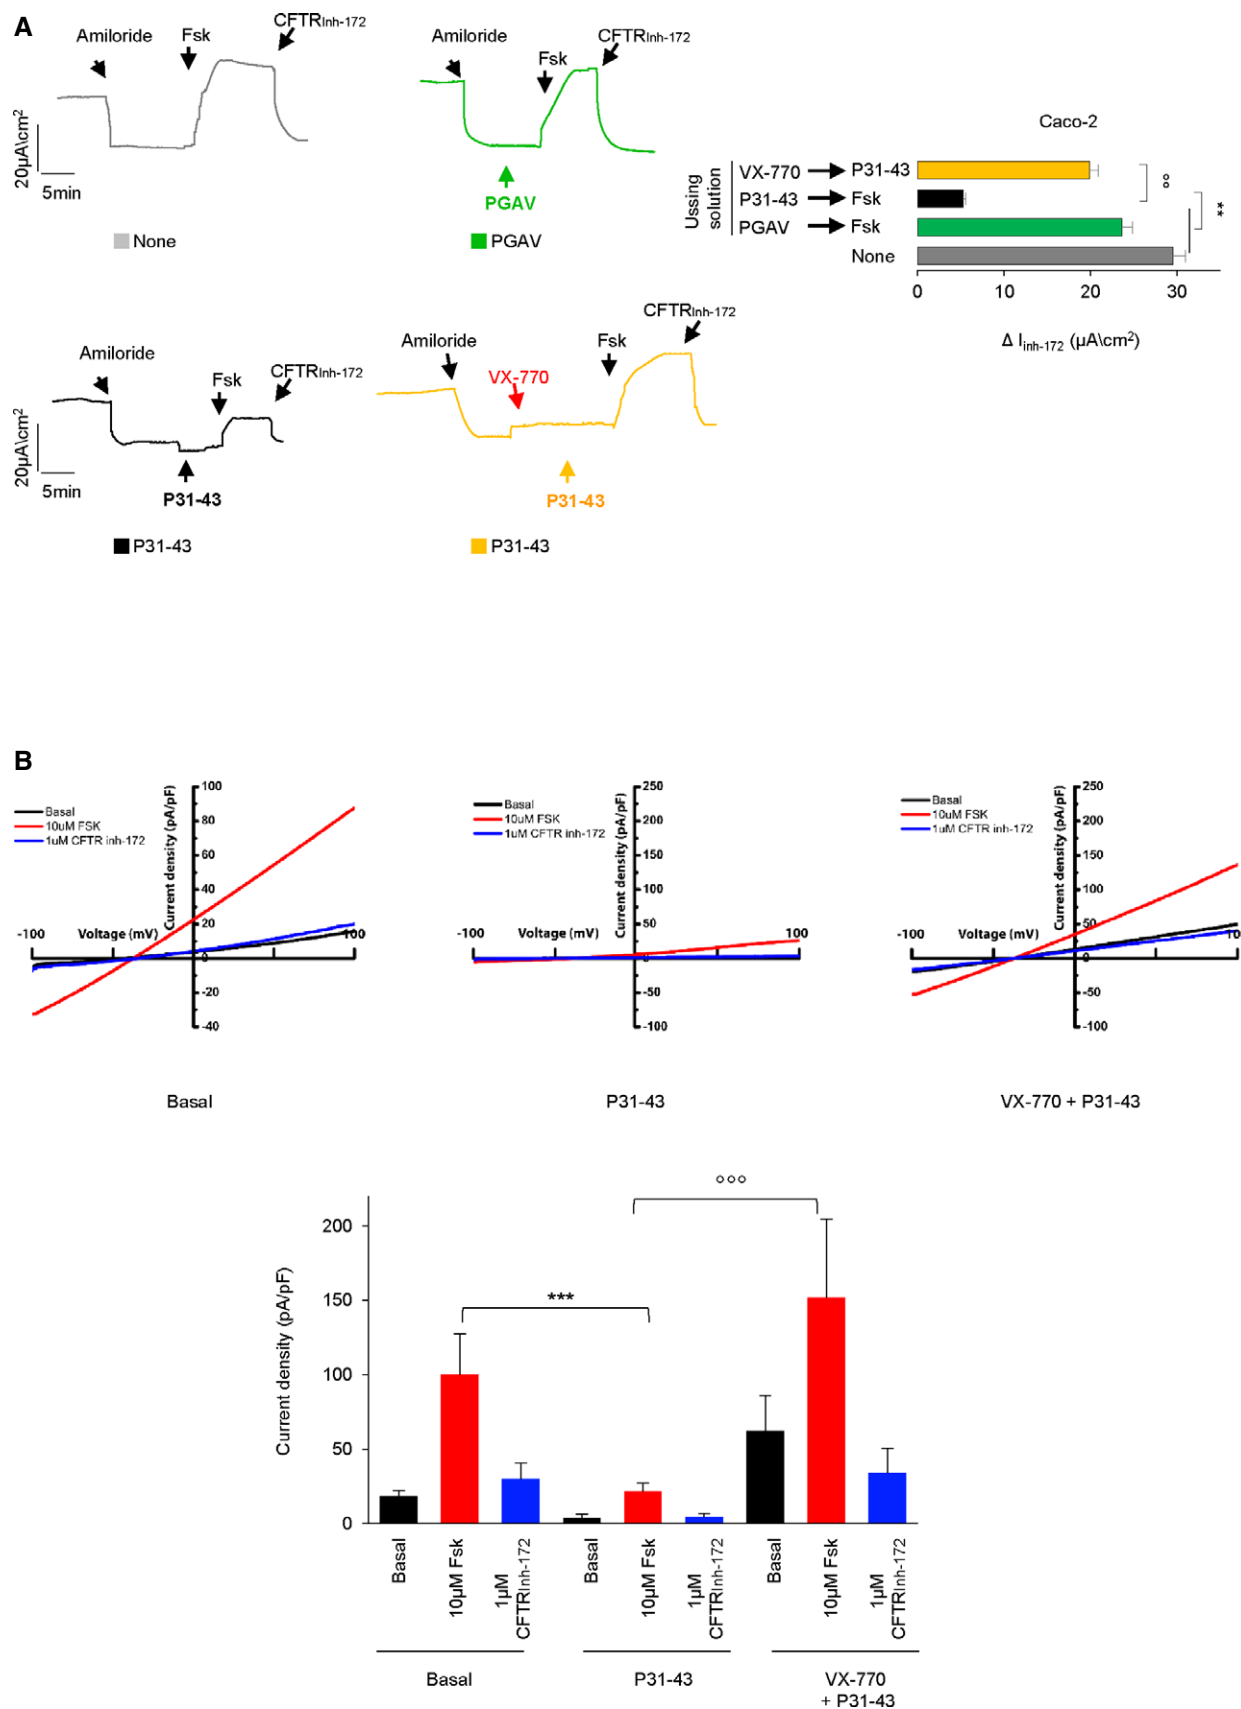

Figure EV2.

**Figure EV3. P31–43 interaction with NBD1.**

- A Caco-2 cells challenged with P31–43 peptide in the presence or absence of pretreatment of VX-770. Confocal analysis of endogenous CFTR interaction with P31–43 by proximity ligation assay (PLA). Scale bar, 10  $\mu$ m. Quantifications were obtained from five randomly selected fields per condition, with each containing ~ 20–25 cells. Data are presented as means  $\pm$  SEM,  $^{*}P < 0.05$  relative to VX-770 + P31–43; two-tailed unpaired Student's *t*-test.
- B Caco-2 cells challenged with biotinylated P31–43 for 5 min at 37°C. Immunoprecipitation of purified protein from membrane fractions in non-reducing and non-denaturing conditions of CFTR protein and immunoblot with streptavidin-HRP or CFTR antibody (left). Immunoblot of purified protein from membrane fractions with anti-CFTR, anti-clathrin, and anti-EEA-1 antibodies. EEA-1 and clathrin were used as controls of purification of clathrin-positive membrane fraction vesicles (middle). Densitometric analysis of protein levels (right). Mean  $\pm$  SD of three independent experiments.
- C Caco-2<sub>CFTR-KO</sub> cells were transfected with pcDNA3.1\_F400A/E403A-CFTR, pcDNA3.1\_P439A/P477A-CFTR, or pcDNA3.b WT-CFTR plasmids (as positive control) or empty vector (as negative control). After 24 h, the cells were challenged with P31–43. Immunoprecipitation in non-reducing and non-denaturing conditions of CFTR protein and immunoblot with streptavidin-HRP or CFTR antibody (*n* = 3 independent experiments).
- D Protein–protein docking and molecular dynamics of P31–43 (green) bound to CFTR.
- E Comparison between the docking poses of P31–43 against CFTR structure (green) and against NBD1 alone (violet).
- F 2D interaction map, between P31–43 peptide retrieved from the molecular docking procedure (PDB: 2BBO). Most important amino acids are detailed (blue circle for P31–43, red circle for NBD1).

Data information: The blots are representative of one experiment for group of treatment.

Source data are available online for this figure.

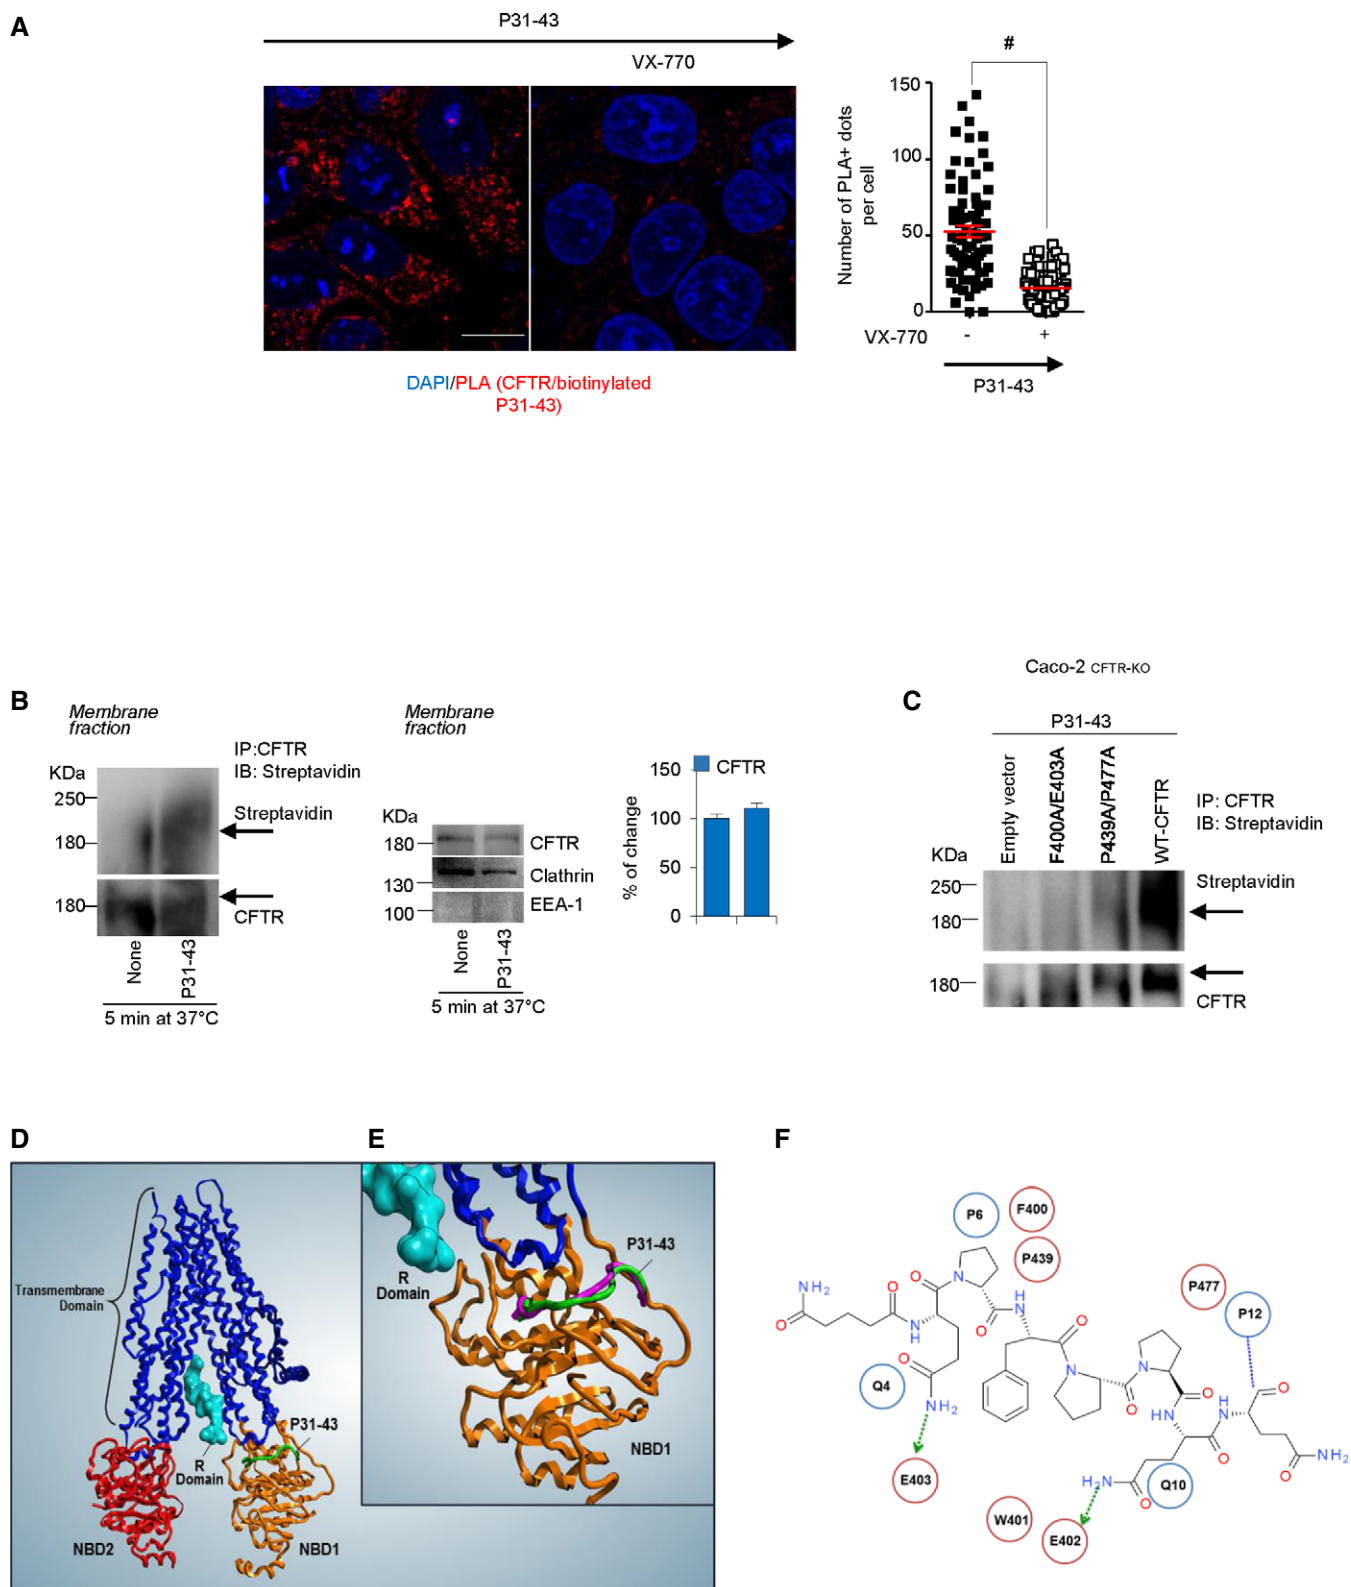

Figure EV3.

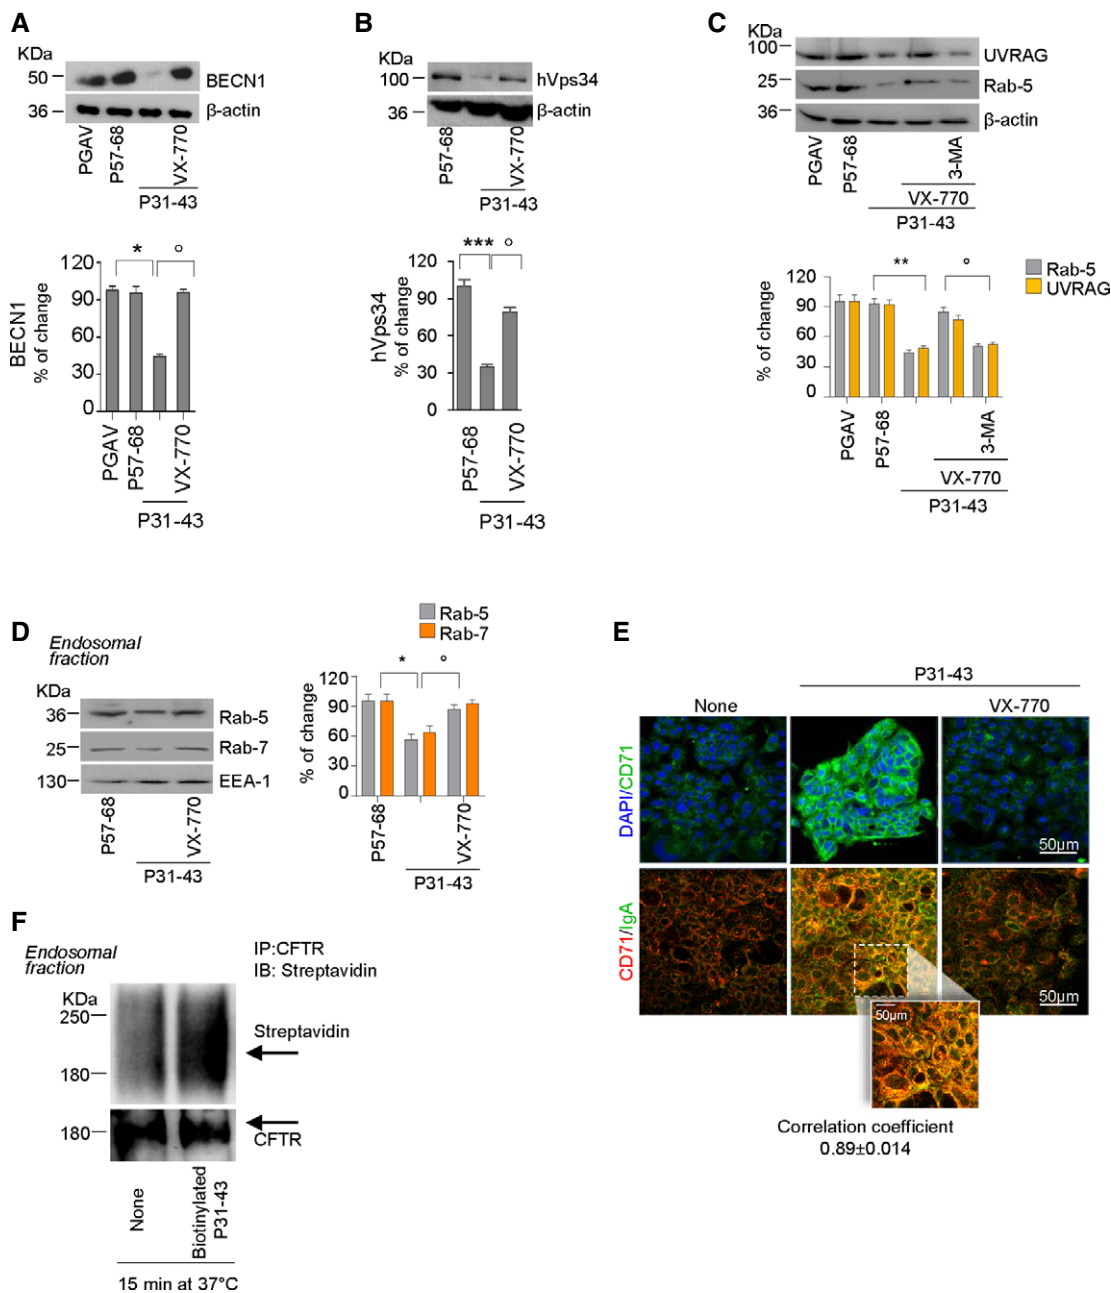

**Figure EV4. Prevention by CFTR potentiators of P31-43 induced derangement of endosomal trafficking.**

Caco-2 cells challenged with P57-68 or PGAV or P31-43 peptides in the presence or absence of pretreatment of VX-770 and 3-MA.

A-C Immunoblot of BECN-1 (A), phosphatidylinositol-3 (PI3)-kinase (hVps34) (B), UVRAG and Rab5 (C), and β-actin; densitometric analysis of protein levels (bottom). Mean ± SD of triplicates of independent experiments. \* $P < 0.05$  or \*\* $P < 0.01$  or \*\*\* $P < 0.001$  vs. P31-43, ° $P < 0.05$  VX-770+P31-43 vs. VX-770 + 3-MA+P31-43 (ANOVA, Bonferroni *post hoc* test).

D Immunoblot of Rab5 and Rab7 proteins in endosomal protein fractions from Caco-2 cells challenged as described; endosomal antigen-1 (EEA-1) as loading control. Densitometric analysis of immunoblot is mean ± SD of triplicates of independent experiments. \* $P < 0.05$  vs. P31-43, ° $P < 0.05$  vs. P31-43 + VX-770.

E Caco-2 cells pre-incubated for 1 h at 4°C with S-IgA from hColostrum and then challenged with P31-43 in the presence or absence of VX-770. Confocal images of apical localization of CD71. Staining with anti-CD71 antibody and DAPI nuclear counterstaining (top) or anti-CD71 (red) and S-IgA (green) antibodies (bottom). Scale bar, 50 µm.

F Immunoprecipitation of CFTR protein in endosomal protein fractions in non-reducing and non-denaturing conditions, after 15 min of challenge with P31-43 and immunoblot with HRP-streptavidin or CFTR.

Data information: The blots are representative of one experiment for group of treatment.

Source data are available online for this figure.

**Figure EV5. Prevention by VX-770 of gliadin-induced effects in gliadin-sensitive mice.**

- A–C BALB/c mice were fed for at least three generations with a gluten-free diet, orally challenged with vehicle or gliadin for 4 weeks (5 mg/daily for 1 week and then 5 mg/daily thrice a week for 3 weeks) in the presence or absence of intraperitoneal VX-770 administered 15 min prior gliadin challenge ( $n = 10$  mice per group of treatment). (A and C) Immunoblot with antibodies against NHERF-1 and ezrin (A) or TG2 (C) and  $\beta$ -actin as loading control, in whole lysates from small intestine homogenates. Right panels, densitometric analysis of protein relative to  $\beta$ -actin, mean  $\pm$  SD of triplicates of independent pooled samples.  $^{**}P < 0.01$  vs. gliadin,  $^{\circ}P < 0.05$  vs. VX-770, (ANOVA, Bonferroni *post hoc* test). (B) Confocal images of small intestine stained with antibodies against occludin (red) with nuclear counterstaining (blue). Scale bar, 100  $\mu$ m.
- D–G NOD mice (D and E) or NOD.scid AB0nullDQ8 mice (NOD-DQ8 mice) (F and G) challenged with gliadin for consecutive 4 weeks in the presence or absence of intraperitoneal administration of VX-770 15 min prior gliadin challenge ( $n = 10$  mice per group of treatment). (D and F) Assessment in Ussing chambers of CFTR-dependent  $\text{Cl}^-$  secretion measured by forskolin-induced (Fsk) increase in the chloride current [ $\text{Isc}$  ( $\mu\text{A}/\text{cm}^2$ )]; quantification of the peak CFTR inhibitor 172 (CFTRinh172)-sensitive  $\text{Isc}$  ( $\Delta\text{Isc}$ ;  $n = 5$ ). Mean  $\pm$  SD of samples assayed.  $^{***}P < 0.001$  vs. VX-770 treatment (Student's *t*-test). (E) IL-15, IL-17A, and IFN- $\gamma$  protein levels from small intestine homogenates of NOD mice. Mean  $\pm$  SD of triplicates of independent pooled samples.  $^{***}P < 0.001$  vs. gliadin,  $^{\circ}P < 0.01$  vs. VX-770 treatment (ANOVA, Bonferroni *post hoc* test). (G) IFN- $\gamma$  protein levels from small intestine homogenates of NOD-DQ8 mice. Mean  $\pm$  SD of triplicates of independent pooled samples.  $^{**}P < 0.01$  vs. gliadin,  $^{\circ}P < 0.05$  vs. VX-770 treatment (ANOVA, Bonferroni *post hoc* test).

Data information: The blots are representative of one experiment for group of treatment.  
Source data are available online for this figure.

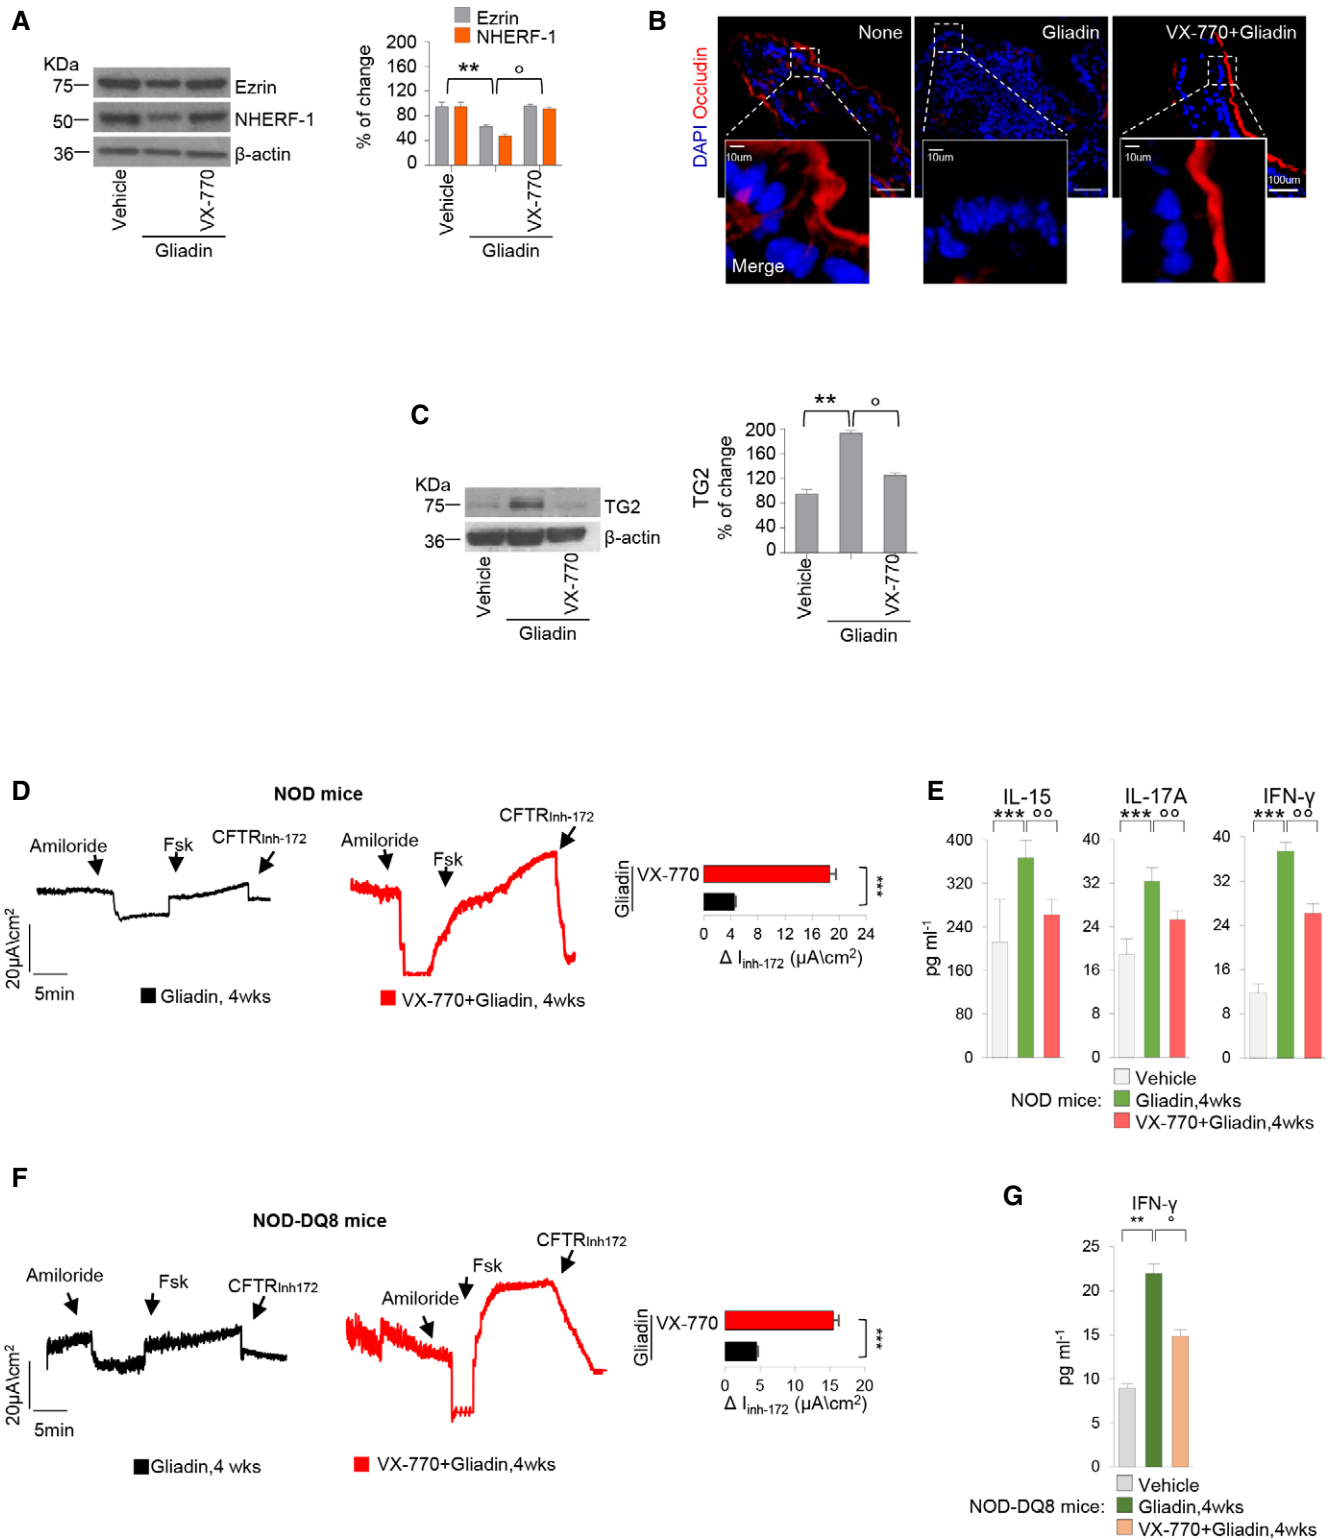

Figure EV5.
